# Supplementary material for: Construction of a Prognostic Model for Predicting Colorectal Cancer Prognosis and Response to Immunotherapy Based on Cuproptosis-Associated lncRNAs
Source: Hindawi journal article supplement (doi:10.1155/2023/2733232), 2023-03-15

A

Patients with T1-2

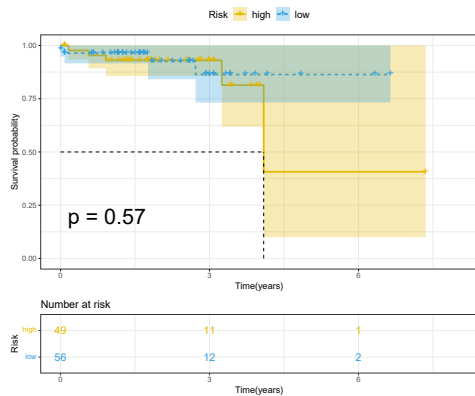

B

Patients with T3-4

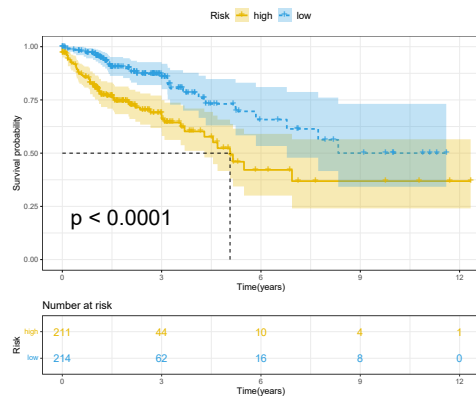

C

Patients with N0

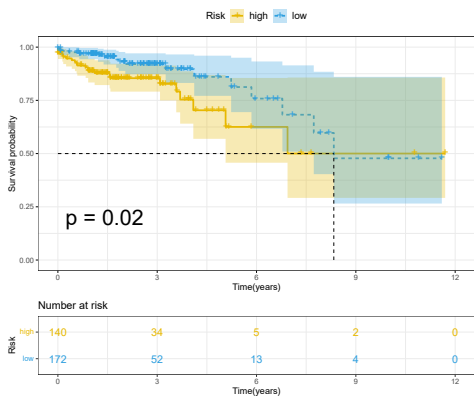

D

Patients with N1-2

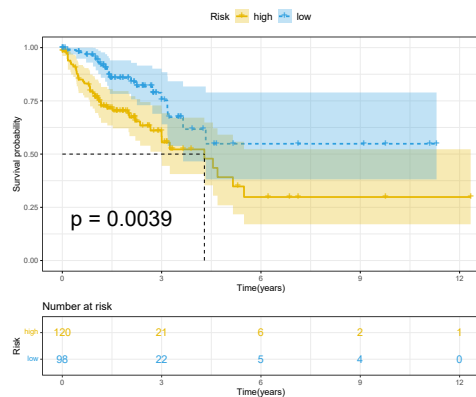

E

Patients with M0

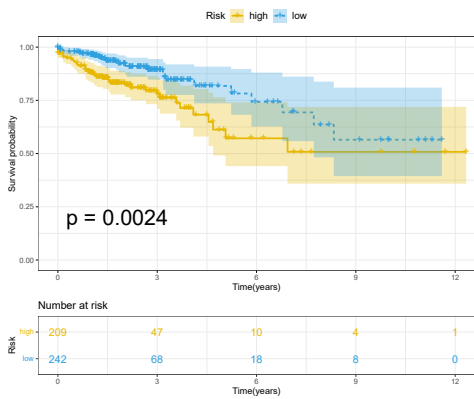

F

Patients with M1

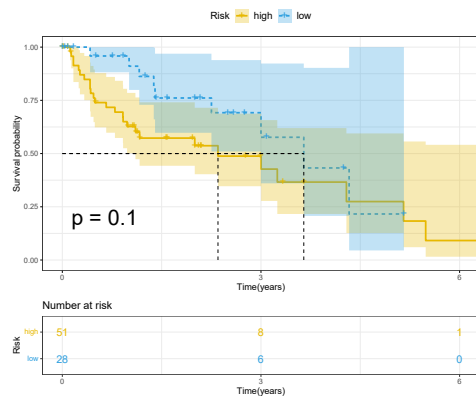

Supplement: f1 [file 2733232.f1.zip]
