# Supplementary figures and images for: Construction of a Prognostic Model for Predicting Colorectal Cancer Prognosis and Response to Immunotherapy Based on Cuproptosis-Associated lncRNAs
Source: Hindawi journal article supplement (doi:10.1155/2023/2733232), 2023-03-15

A

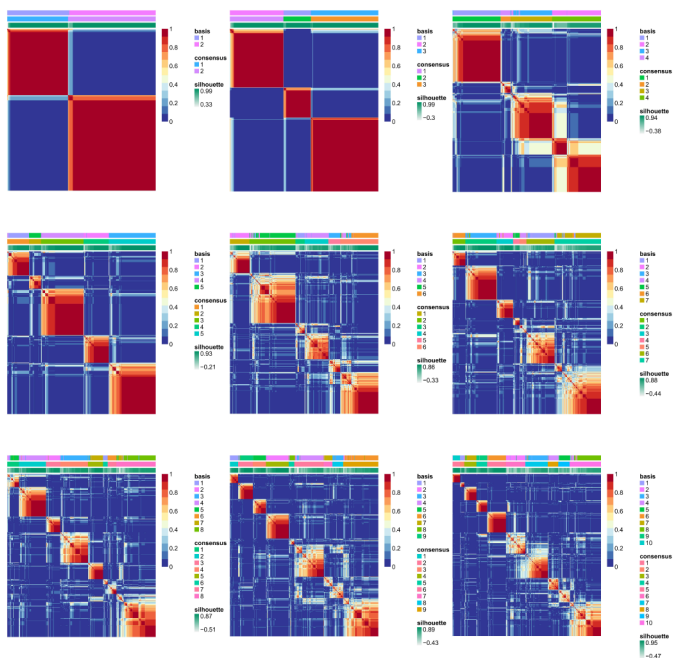

B

NMF rank survey

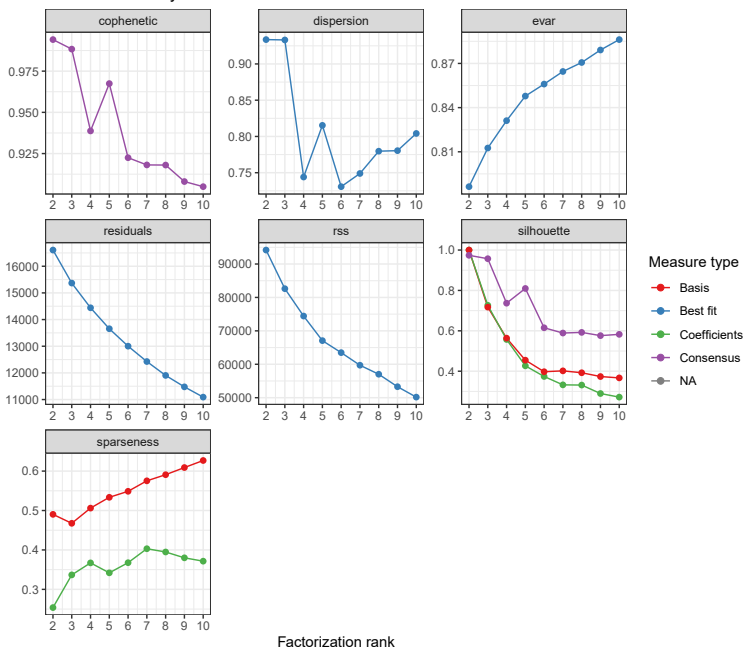

Supplement: f1 [file 2733232.f1.zip]

A

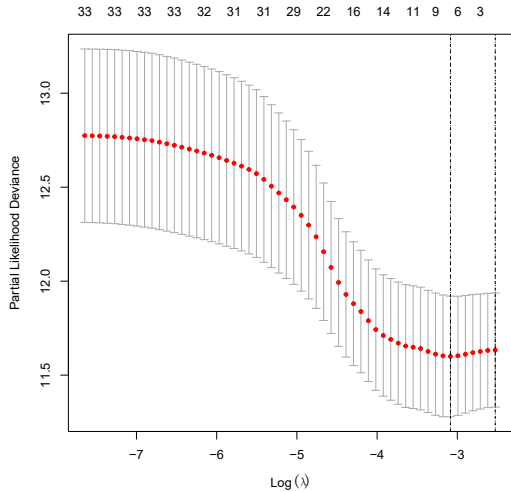

B

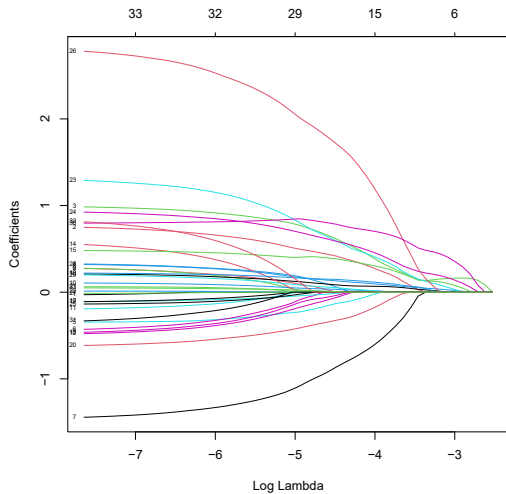

Supplement: f1 [file 2733232.f1.zip]
